# Supplementary material for: A Multicriteria Analysis to Support Natural Resource Governance: The Case of Chestnut Forests
Source: MDPI journal article supplement (doi:10.3390/resources12030040), 2023-03-20
Supplement: s1 [file s1]

Archive with 3 entries (3 files):
- Document 1. AHP_Questionnaire.pdf
- Document 2. Guide_to_filling_in_the_AHP_Questionnaire.pdf
- Document 3. Description_of_SWOT_Factors.pdf
