# Supplementary material for: A Multicriteria Analysis to Support Natural Resource Governance: The Case of Chestnut Forests
Source: MDPI journal article supplement (doi:10.3390/resources12030040), 2023-03-20
Supplement: s1 [file s1 › Document 1. AHP_Questionnaire.pdf]

## A) STRENGTHS OF THE CHESTNUT RESOURCE

| Factor                                                     | Factor weighting score |   |   |   |   |   |   |   |       |                     |   |   |   |   |   |   | Factor |                                                            |
|------------------------------------------------------------|------------------------|---|---|---|---|---|---|---|-------|---------------------|---|---|---|---|---|---|--------|------------------------------------------------------------|
|                                                            | More important than    |   |   |   |   |   |   |   | Equal | Less important than |   |   |   |   |   |   |        |                                                            |
| Good availability of the resource                          | 9                      | 8 | 7 | 6 | 5 | 4 | 3 | 2 | 1     | 2                   | 3 | 4 | 5 | 6 | 7 | 8 | 9      | Vocational training initiatives                            |
| Provision of ecosystem services (cultural and protection)  | 9                      | 8 | 7 | 6 | 5 | 4 | 3 | 2 | 1     | 2                   | 3 | 4 | 5 | 6 | 7 | 8 | 9      | Diversity of wood assortments                              |
| Strong knowledge of the chestnut resource and its products | 9                      | 8 | 7 | 6 | 5 | 4 | 3 | 2 | 1     | 2                   | 3 | 4 | 5 | 6 | 7 | 8 | 9      | Generational change of forest entrepreneurs                |
| Diversity of wood assortments                              | 9                      | 8 | 7 | 6 | 5 | 4 | 3 | 2 | 1     | 2                   | 3 | 4 | 5 | 6 | 7 | 8 | 9      | Vocational training initiatives                            |
| Strong knowledge of the chestnut resource and its products | 9                      | 8 | 7 | 6 | 5 | 4 | 3 | 2 | 1     | 2                   | 3 | 4 | 5 | 6 | 7 | 8 | 9      | Vocational training initiatives                            |
| Vocational training initiatives                            | 9                      | 8 | 7 | 6 | 5 | 4 | 3 | 2 | 1     | 2                   | 3 | 4 | 5 | 6 | 7 | 8 | 9      | Generational renewal of forest entrepreneurs               |
| Good availability of the resource                          | 9                      | 8 | 7 | 6 | 5 | 4 | 3 | 2 | 1     | 2                   | 3 | 4 | 5 | 6 | 7 | 8 | 9      | Provision of ecosystem services (cultural and protection)  |
| Diversity of wood assortments                              | 9                      | 8 | 7 | 6 | 5 | 4 | 3 | 2 | 1     | 2                   | 3 | 4 | 5 | 6 | 7 | 8 | 9      | Strong knowledge of the chestnut resource and its products |
| Diversity of woody assortments                             | 9                      | 8 | 7 | 6 | 5 | 4 | 3 | 2 | 1     | 2                   | 3 | 4 | 5 | 6 | 7 | 8 | 9      | Generational renewal of forest entrepreneurs               |
| Provision of ecosystem services (cultural and protection)  | 9                      | 8 | 7 | 6 | 5 | 4 | 3 | 2 | 1     | 2                   | 3 | 4 | 5 | 6 | 7 | 8 | 9      | Generational renewal of forest entrepreneurs               |
| Provision of ecosystem services (cultural and protection)  | 9                      | 8 | 7 | 6 | 5 | 4 | 3 | 2 | 1     | 2                   | 3 | 4 | 5 | 6 | 7 | 8 | 9      | Strong knowledge of the chestnut resource and its products |
| Good resource availability                                 | 9                      | 8 | 7 | 6 | 5 | 4 | 3 | 2 | 1     | 2                   | 3 | 4 | 5 | 6 | 7 | 8 | 9      | Diversity of wood assortments                              |
| Provision of ecosystem services (cultural and protection)  | 9                      | 8 | 7 | 6 | 5 | 4 | 3 | 2 | 1     | 2                   | 3 | 4 | 5 | 6 | 7 | 8 | 9      | Vocational training initiatives                            |
| Good resource availability                                 | 9                      | 8 | 7 | 6 | 5 | 4 | 3 | 2 | 1     | 2                   | 3 | 4 | 5 | 6 | 7 | 8 | 9      | Generational renewal of forest entrepreneurs               |
| Good availability of the resource                          | 9                      | 8 | 7 | 6 | 5 | 4 | 3 | 2 | 1     | 2                   | 3 | 4 | 5 | 6 | 7 | 8 | 9      | Strong knowledge of the chestnut resource and its products |

## B) WEAKNESSES OF THE CHESTNUT RESOURCE

| Factor                                                                             | Factor weighting score |   |   |   |   |   |   |   |       |                     |   |   |   |   |   |   |   | Factor                                                                             |
|------------------------------------------------------------------------------------|------------------------|---|---|---|---|---|---|---|-------|---------------------|---|---|---|---|---|---|---|------------------------------------------------------------------------------------|
|                                                                                    | More important than    |   |   |   |   |   |   |   | Equal | Less important than |   |   |   |   |   |   |   |                                                                                    |
| Weakly harmonised forest management                                                | 9                      | 8 | 7 | 6 | 5 | 4 | 3 | 2 | 1     | 2                   | 3 | 4 | 5 | 6 | 7 | 8 | 9 | Lack of public support for the provision of ecosystem services (PES)               |
| Negative spotting value                                                            | 9                      | 8 | 7 | 6 | 5 | 4 | 3 | 2 | 1     | 2                   | 3 | 4 | 5 | 6 | 7 | 8 | 9 | Technological defects in wood                                                      |
| Negative stumpage value                                                            | 9                      | 8 | 7 | 6 | 5 | 4 | 3 | 2 | 1     | 2                   | 3 | 4 | 5 | 6 | 7 | 8 | 9 | Land pathology and orographic context                                              |
| Land pathology and orographic context                                              | 9                      | 8 | 7 | 6 | 5 | 4 | 3 | 2 | 1     | 2                   | 3 | 4 | 5 | 6 | 7 | 8 | 9 | Weakly harmonised forest management                                                |
| Negative landscape value                                                           | 9                      | 8 | 7 | 6 | 5 | 4 | 3 | 2 | 1     | 2                   | 3 | 4 | 5 | 6 | 7 | 8 | 9 | Lack of public support for the provision of ecosystem services (PES)               |
| Technological obsolescence and poor innovation support in processing companies     | 9                      | 8 | 7 | 6 | 5 | 4 | 3 | 2 | 1     | 2                   | 3 | 4 | 5 | 6 | 7 | 8 | 9 | Technological timber defects                                                       |
| Weakly harmonised forest management                                                | 9                      | 8 | 7 | 6 | 5 | 4 | 3 | 2 | 1     | 2                   | 3 | 4 | 5 | 6 | 7 | 8 | 9 | Wood technological defects                                                         |
| Land pathology and orographic context                                              | 9                      | 8 | 7 | 6 | 5 | 4 | 3 | 2 | 1     | 2                   | 3 | 4 | 5 | 6 | 7 | 8 | 9 | Wood technological defects                                                         |
| Land pathology and orographic context                                              | 9                      | 8 | 7 | 6 | 5 | 4 | 3 | 2 | 1     | 2                   | 3 | 4 | 5 | 6 | 7 | 8 | 9 | Lack of public support for the provision of ecosystem services (PES)               |
| Technological timber defects                                                       | 9                      | 8 | 7 | 6 | 5 | 4 | 3 | 2 | 1     | 2                   | 3 | 4 | 5 | 6 | 7 | 8 | 9 | Lack of public support for the provision of ecosystem services (PES)               |
| Weakly harmonised forest management                                                | 9                      | 8 | 7 | 6 | 5 | 4 | 3 | 2 | 1     | 2                   | 3 | 4 | 5 | 6 | 7 | 8 | 9 | Technological obsolescence and poor support for innovation in processing companies |
| Negative spotting value                                                            | 9                      | 8 | 7 | 6 | 5 | 4 | 3 | 2 | 1     | 2                   | 3 | 4 | 5 | 6 | 7 | 8 | 9 | Weakly harmonised forest management                                                |
| Land pathology and orographic context                                              | 9                      | 8 | 7 | 6 | 5 | 4 | 3 | 2 | 1     | 2                   | 3 | 4 | 5 | 6 | 7 | 8 | 9 | Technological obsolescence and poor support for innovation in processors           |
| Technological obsolescence and poor support for innovation in processing companies | 9                      | 8 | 7 | 6 | 5 | 4 | 3 | 2 | 1     | 2                   | 3 | 4 | 5 | 6 | 7 | 8 | 9 | Lack of public support for the provision of ecosystem services (PES)               |
| Negative spotting value                                                            | 9                      | 8 | 7 | 6 | 5 | 4 | 3 | 2 | 1     | 2                   | 3 | 4 | 5 | 6 | 7 | 8 | 9 | Technological obsolescence and poor support for innovation in processors           |

### C) OPPORTUNITIES OF THE CHESTNUT RESOURCE

| Factor                                  | Factor weighting score |   |   |   |   |   |   |   |       |                     |   |   |   |   |   |   | Factor |                                                         |
|-----------------------------------------|------------------------|---|---|---|---|---|---|---|-------|---------------------|---|---|---|---|---|---|--------|---------------------------------------------------------|
|                                         | More important than    |   |   |   |   |   |   |   | Equal | Less important than |   |   |   |   |   |   |        |                                                         |
| Enterprise networks                     | 9                      | 8 | 7 | 6 | 5 | 4 | 3 | 2 | 1     | 2                   | 3 | 4 | 5 | 6 | 7 | 8 | 9      | Forest certification and quality labels                 |
| Chestnut research projects              | 9                      | 8 | 7 | 6 | 5 | 4 | 3 | 2 | 1     | 2                   | 3 | 4 | 5 | 6 | 7 | 8 | 9      | Forest certification and quality labels                 |
| Forest certification and quality labels | 9                      | 8 | 7 | 6 | 5 | 4 | 3 | 2 | 1     | 2                   | 3 | 4 | 5 | 6 | 7 | 8 | 9      | Increased civil society awareness of ecosystem services |
| Enterprise networks                     | 9                      | 8 | 7 | 6 | 5 | 4 | 3 | 2 | 1     | 2                   | 3 | 4 | 5 | 6 | 7 | 8 | 9      | Increased civil society awareness of ecosystem services |
| Chestnut Research Projects              | 9                      | 8 | 7 | 6 | 5 | 4 | 3 | 2 | 1     | 2                   | 3 | 4 | 5 | 6 | 7 | 8 | 9      | Increased civil society awareness of ecosystem services |
| Chestnut research projects              | 9                      | 8 | 7 | 6 | 5 | 4 | 3 | 2 | 1     | 2                   | 3 | 4 | 5 | 6 | 7 | 8 | 9      | Enterprise networks                                     |

# D) THREATS OF THE CHESTNUT RESOURCE

| Factor                                                  | Factor weighting score |   |   |   |   |   |   |   |       |                     |   |   |   |   |   |   |   | Factor                                                                |
|---------------------------------------------------------|------------------------|---|---|---|---|---|---|---|-------|---------------------|---|---|---|---|---|---|---|-----------------------------------------------------------------------|
|                                                         | More important than    |   |   |   |   |   |   |   | Equal | Less important than |   |   |   |   |   |   |   |                                                                       |
| Climate change                                          | 9                      | 8 | 7 | 6 | 5 | 4 | 3 | 2 | 1     | 2                   | 3 | 4 | 5 | 6 | 7 | 8 | 9 | Depopulation of mountain areas                                        |
| Climate change                                          | 9                      | 8 | 7 | 6 | 5 | 4 | 3 | 2 | 1     | 2                   | 3 | 4 | 5 | 6 | 7 | 8 | 9 | Uncertainty about subsidies and incentives for the forest-wood sector |
| Depopulation of mountain areas                          | 9                      | 8 | 7 | 6 | 5 | 4 | 3 | 2 | 1     | 2                   | 3 | 4 | 5 | 6 | 7 | 8 | 9 | Uncertainty about subsidies and incentives for the forest-wood sector |
| Lack of market knowledge and strong foreign competition | 9                      | 8 | 7 | 6 | 5 | 4 | 3 | 2 | 1     | 2                   | 3 | 4 | 5 | 6 | 7 | 8 | 9 | Uncertainty about subsidies and incentives for the forest-wood sector |
| Climate change                                          | 9                      | 8 | 7 | 6 | 5 | 4 | 3 | 2 | 1     | 2                   | 3 | 4 | 5 | 6 | 7 | 8 | 9 | Lack of market knowledge and strong foreign competition               |
| Depopulation of mountain areas                          | 9                      | 8 | 7 | 6 | 5 | 4 | 3 | 2 | 1     | 2                   | 3 | 4 | 5 | 6 | 7 | 8 | 9 | Little knowledge of the market and strong foreign competition         |
